# Supplementary material
Source: publisher site journal article supplement (https://www.dovepress.com/article/594951)
Supplement: Supplementary file 1 [file 594951%20Supplementary%20material.docx]

**Mitochondria-Targeted MPDA Nanosystem Co-Delivering Evodiamine and IR820 for Chemo-Photothermal Therapy of Hepatocellular Carcinoma**

Shasha Kong1,2,a, Yuling Liu1,a,Ruying Tang1, Hui Li1,2*, Hongmei Lin3,4*, Longfei Lin1*


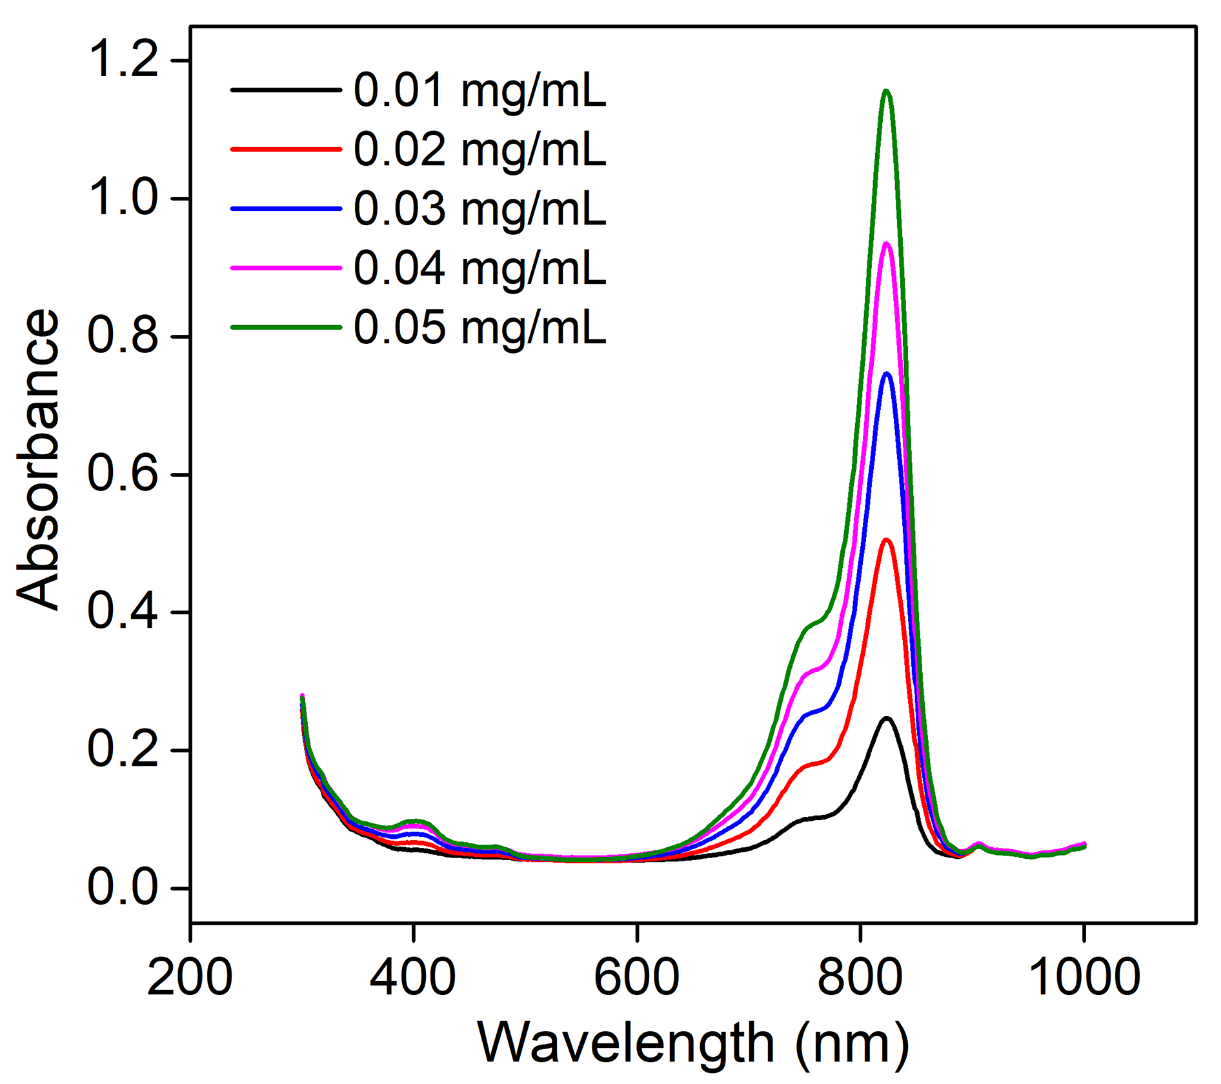


Figure S1. UV-Vis absorption spectrum of the 0.01 - 0.05 mg/mL IR820 solution within the wavelength range of 300 - 1000 nm.


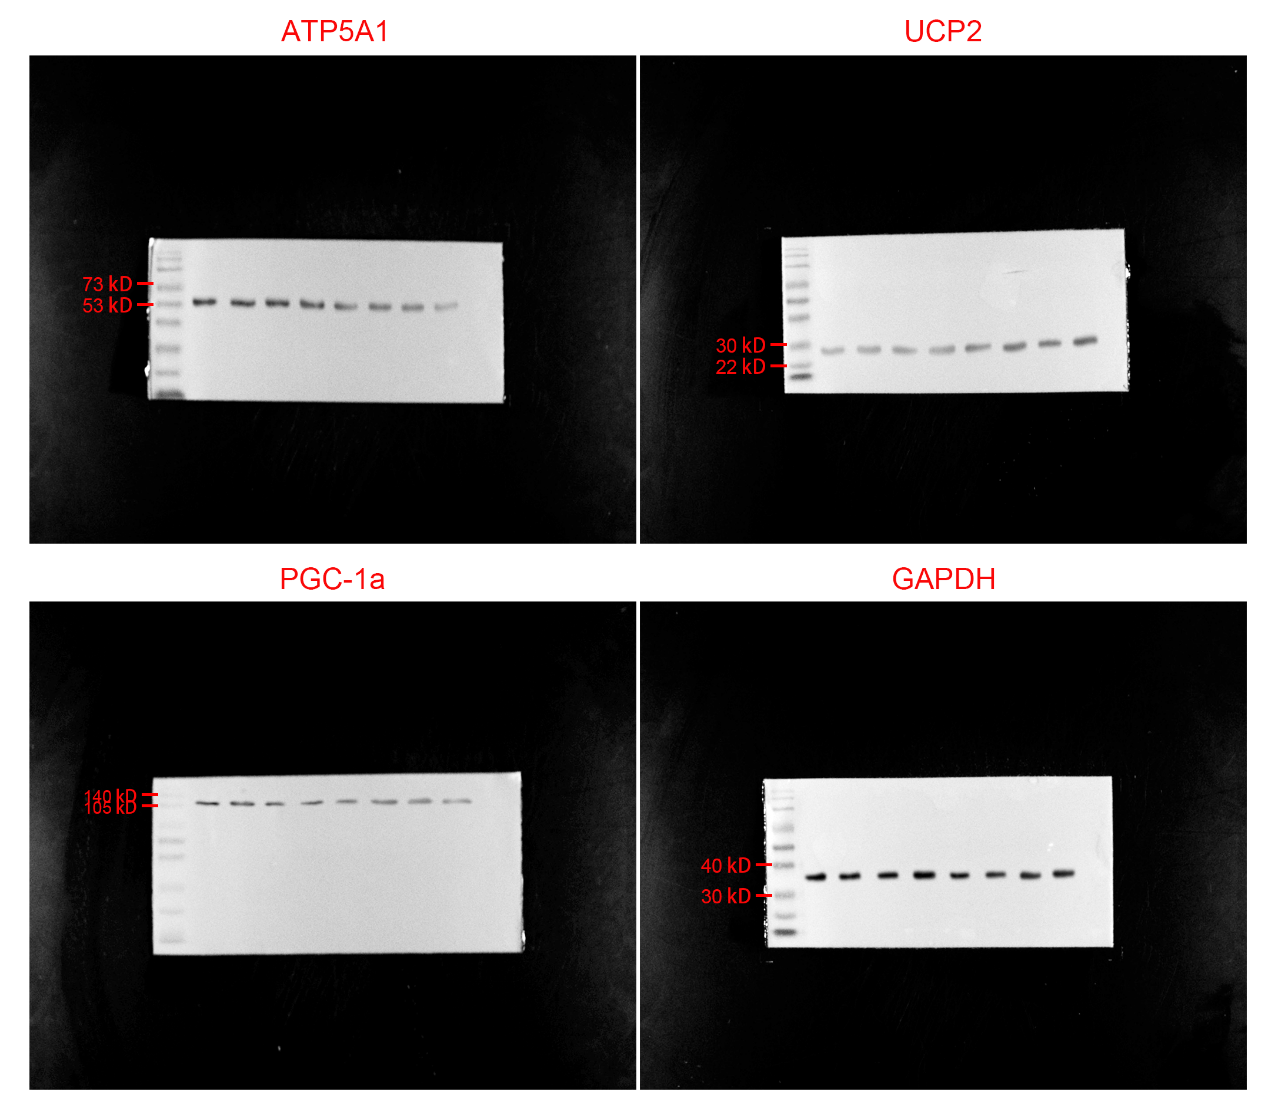


Figure S2. The original Western blot images of mitochondrial damage-related proteins (ATP5A1, UCP2, PGC-1α).


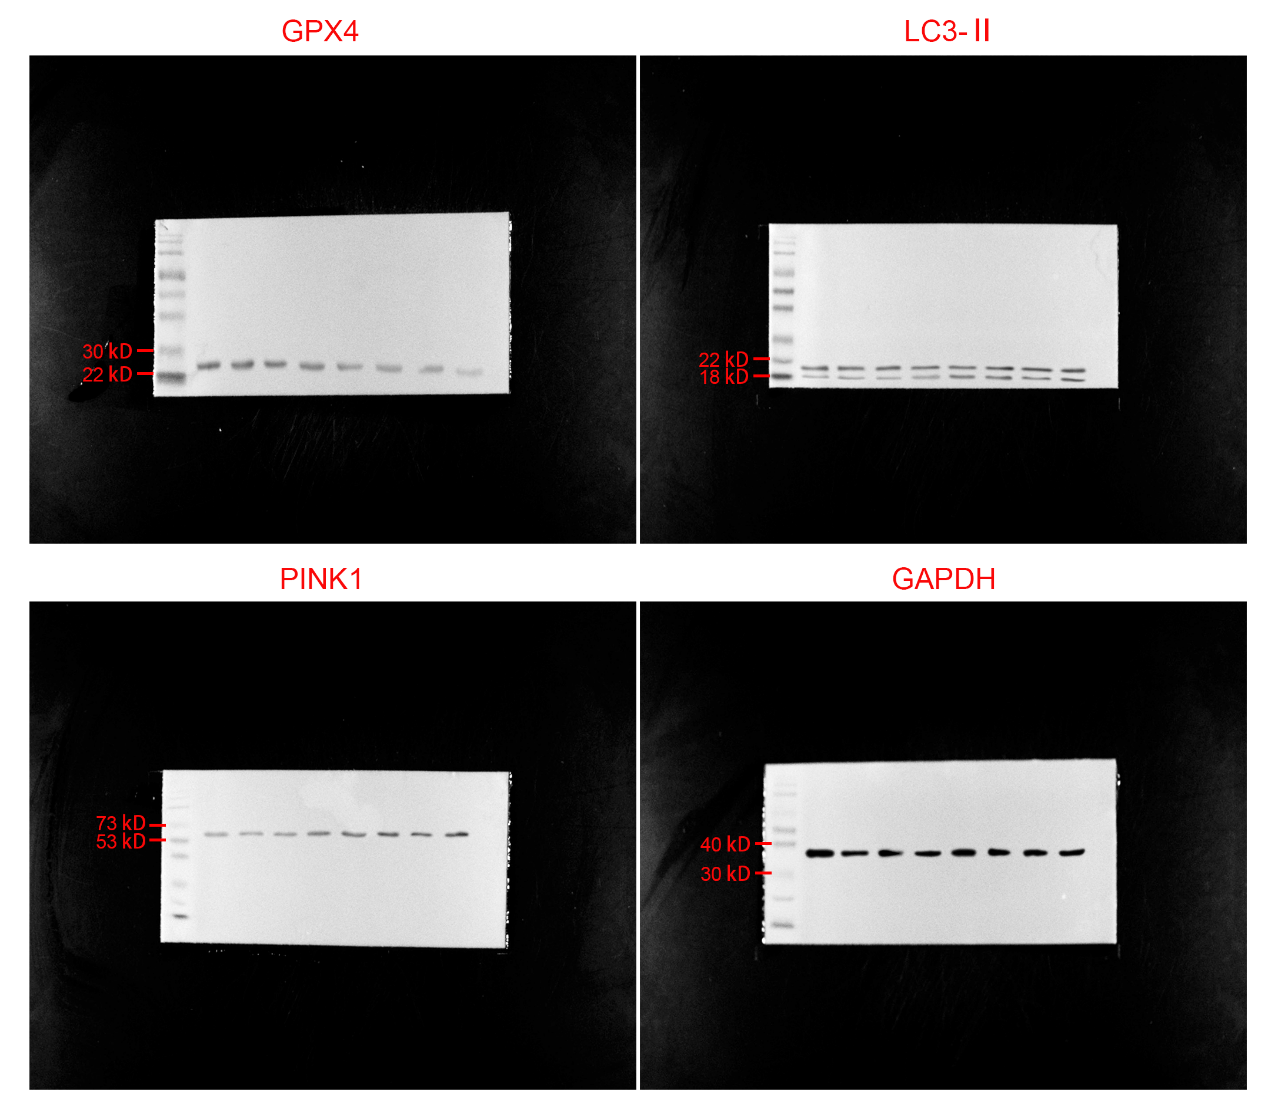


Figure S3. The original Western blot images of oxidative stress marker GPX4 and autophagy-related proteins (LC3-II, PINK1).


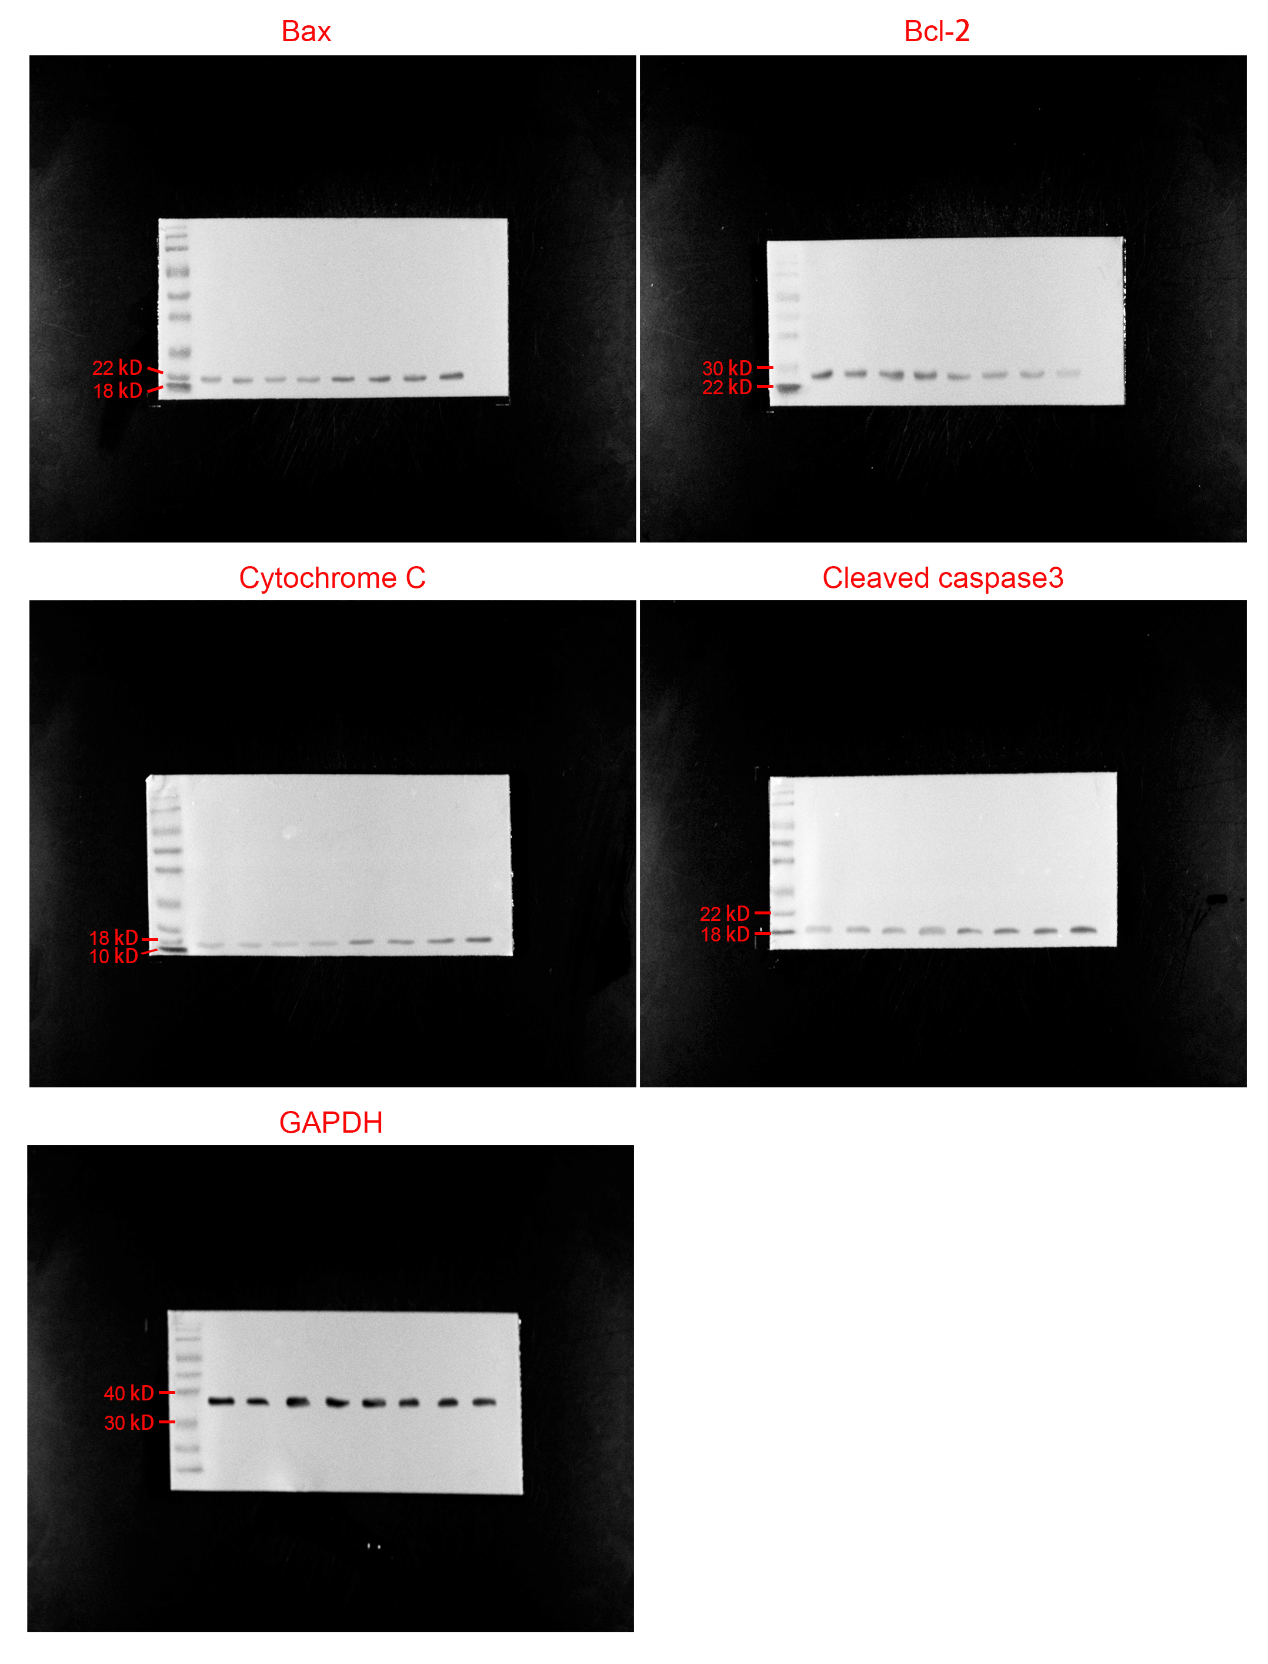


Figure S4. The original Western blot images of apoptosis-related proteins (Bax, Bcl-2, Cytochrome C, Cleaved Caspase-3).


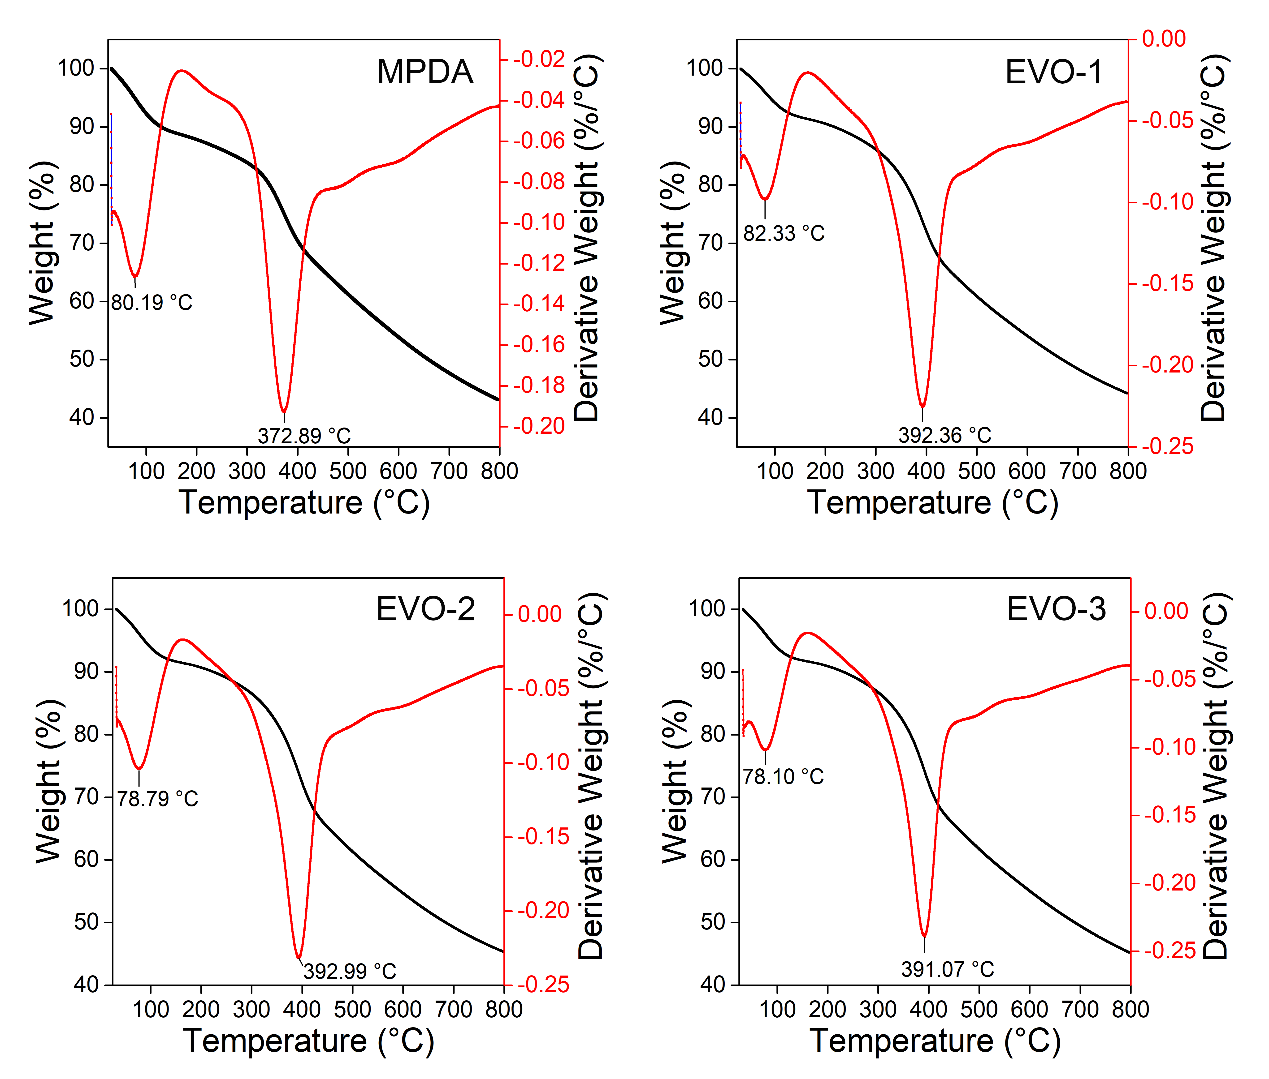


Figure S5. Thermogravimetric analysis (TGA) of different nanoparticles. EVO-1, IR820/EVO@MPDA; EVO-2, IR820/EVO@MPDA-cRGD; EVO-3, IR820/EVO@MPDA-TPP/cRGD.


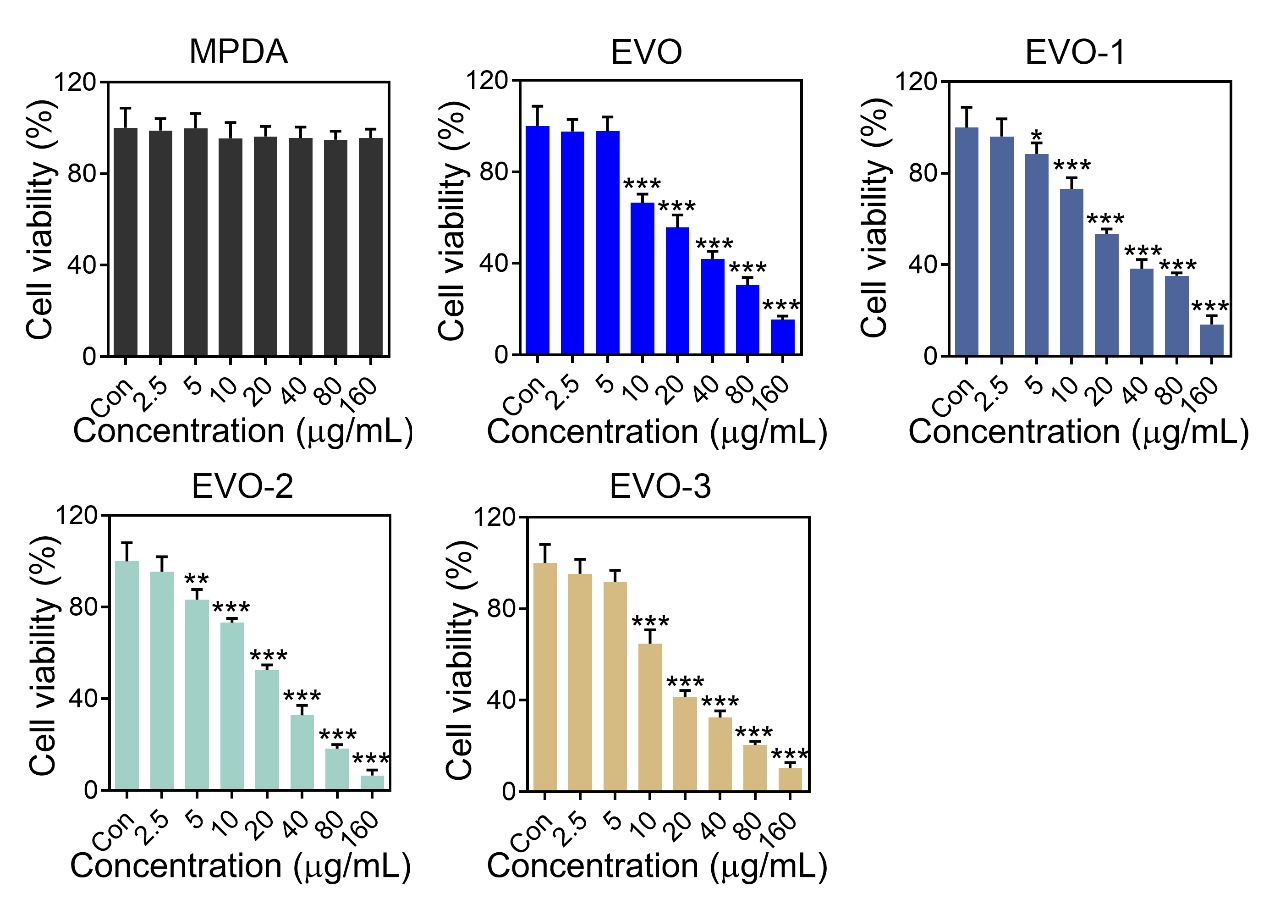


Figure S6. Viability of Huh-7 cells after 24 h treatment with varying concentrations of MPDA, free EVO, IR820/EVO@MPDA (EVO-1), IR820/EVO@MPDA-cRGD (EVO-2), and IR820/EVO@MPDA-TPP/cRGD (EVO-3). Data represent mean ± SD (*n* = 6). *p < 0.05, **p < 0.01, ***p < 0.001 vs Con group.


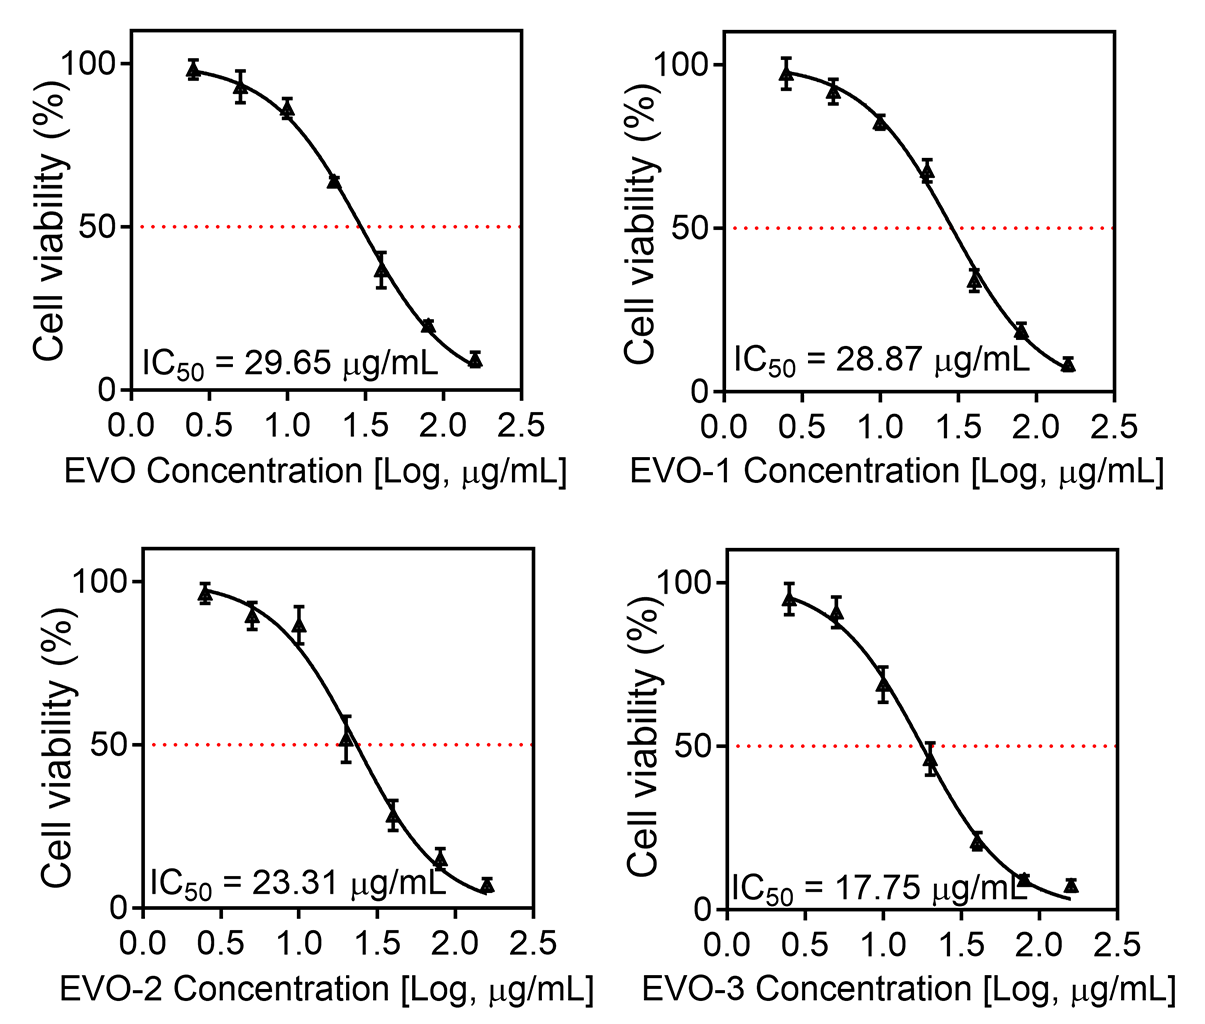


Figure S7. The half-maximal inhibitory concentration (IC₅₀) values of free EVO, IR820/EVO@MPDA (EVO-1), IR820/EVO@MPDA-cRGD (EVO-2), and IR820/EVO@MPDA-TPP/cRGD (EVO-3) after 24 hours treatment of HepG2 cells. Data represent mean ± SD (*n* = 6).


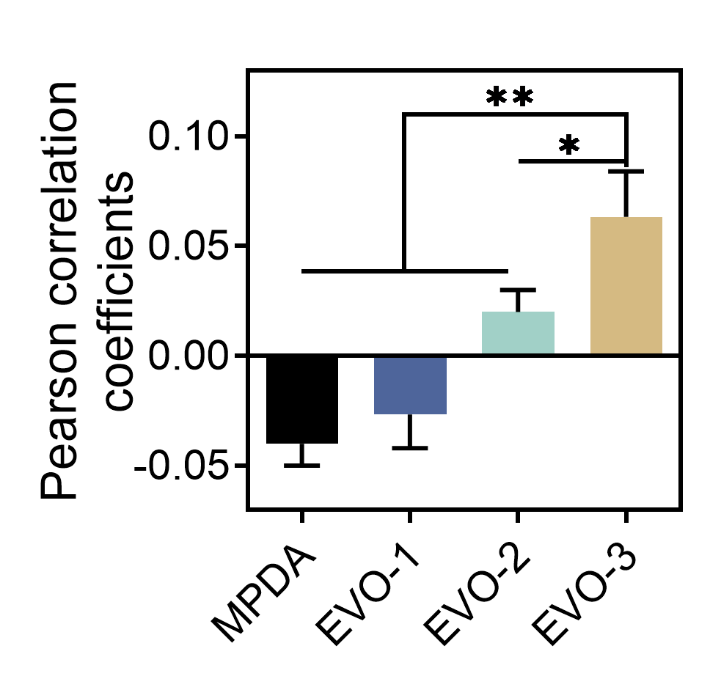


Figure S8. Pearson’s correlation coefficient calculation performed by ImageJ software along the randomly selected lines in panel. Data represent mean ± SD (*n* = 3). *p < 0.05, **p < 0.01, vs Con group. EVO-1, IR820/EVO@MPDA; EVO-2, IR820/EVO@MPDA-cRGD; EVO-3, IR820/EVO@MPDA-TPP/cRGD.

Table S1. The drug encapsulation efficiency (DEE) and drug loading capacity (DLC) of IR820 and EVO in different nanosystems.

|  | IR820 (%) | | EVO (%) | |
| --- | --- | --- | --- | --- |
|  | DEE | DLC | DEE | DLC |
| IR820/EVO@MPDA | 45.0 | 5.4 | 35.0 | 4.2 |
| IR820/EVO@MPDA-cRGD | 46.7 | 5.6 | 34.7 | 4.2 |
| IR820/EVO@MPDA-TPP/cRGD | 41.7 | 5.0 | 38.3 | 4.6 |

**Table S2.** Kinetic parameters of EVO release from IR820/EVO@MPDA-TPP/cRGD fitted to Higuchi and Ritger-Peppas models.

| Condition | Higuchi model | Fitting curve equation | Ritger-Peppas | Fitting curve equation |
| --- | --- | --- | --- | --- |
| Without laser | 0.917 | y=7.98x1/2+23.83 | 0.952 | y=28.98x0.25 |
| With laser | 0.895 | y=7.52x1/2+34.63 | 0.967 | y=38.74x0.20 |

Table S3. The tumor suppression rates (TSR) of different nanoparticles.

| Group | Abbreviation | TSR ± SD (%) |
| --- | --- | --- |
| Con | Con | 0.00 ± 9.21 |
| MPDA | MPDA | 2.44 ± 10.11 |
| EVO | EVO | 40.07 ± 7.70 |
| IR820/EVO@MPDA | EVO-1 | 51.83 ± 7.43 |
| IR820/EVO@MPDA+Laser | EVO-1+L | 59.27 ± 7.90 |
| IR820/EVO@MPDA-cRGD | EVO-2 | 66.79 ± 4.22 |
| IR820/EVO@MPDA-cRGD+Laser | EVO-2+L | 71.59 ± 4.88 |
| IR820/EVO@MPDA-TPP/cRGD | EVO-3 | 77.33 ± 5.94 |
| IR820/EVO@MPDA-TPP/cRGD+Laser | EVO-3+L | 85.23 ± 4.47 |
